# Supplementary material for: Financial Difficulty Over Time in Young Adults With Breast Cancer
Source: PubMed Central journal article supplement (PMC11561695; doi:10.1001/jamanetworkopen.2024.46091), 2024-11-13

## Supplemental Online Content

Myers SP, Zheng Y, Dibble K, et al. Financial difficulty after breast cancer. *JAMA Network Open*. 2024;7(11):e2446091. doi:10.1001/jamanetworkopen.2024.46091

**eFigure.** Prevalence of Financial Difficulty as Indicated by 5-Point Likert Scale Response Indicating the Degree to Which Participant Experiences Financial Problems

This supplemental material has been provided by the authors to give readers additional information about their work.

**eFigure.** Prevalence of financial difficulty as indicated by 5-point Likert scale response indicating the degree to which participant experiences financial problems.

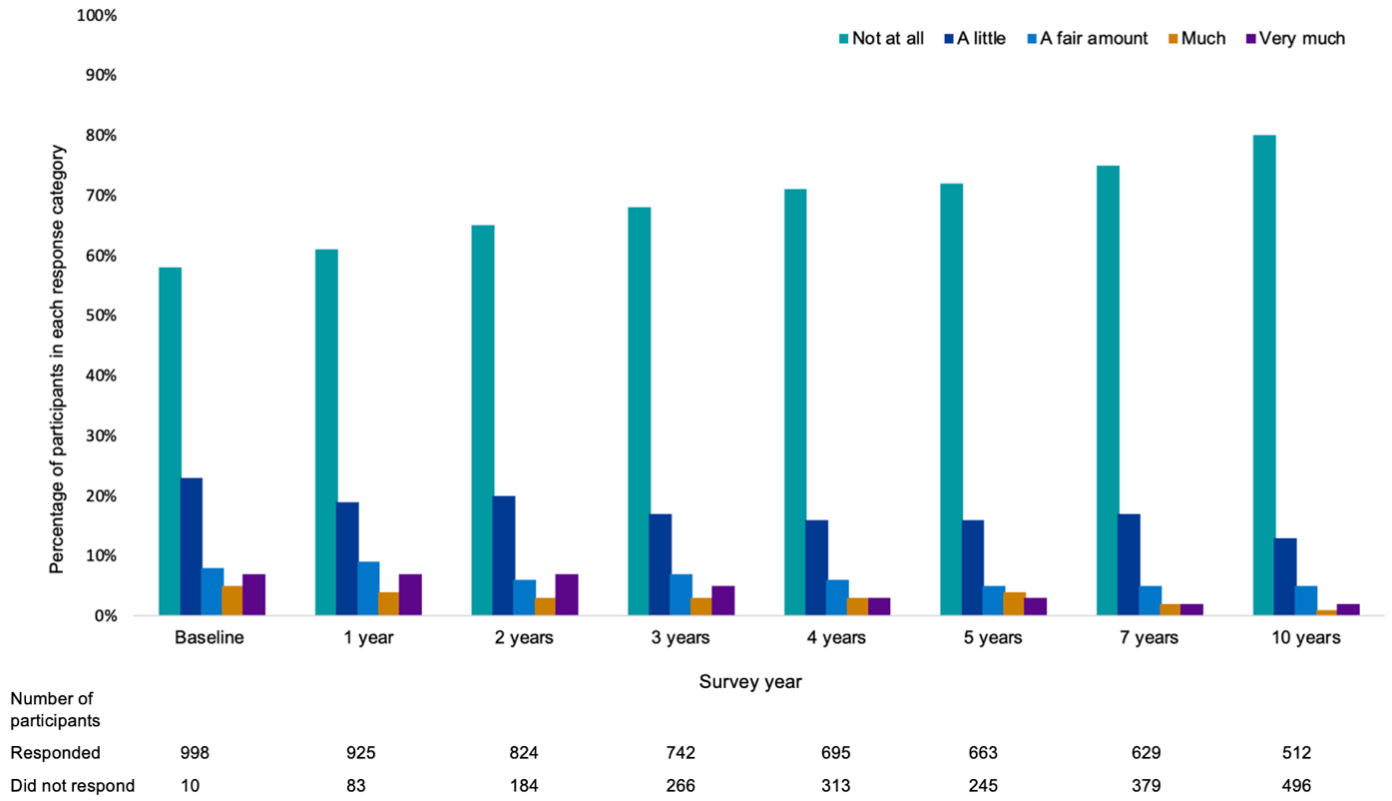

Supplement: jamanetwopen-e2446091-s001.pdf [file jamanetwopen-e2446091-s001.pdf]
