# Supplementary material for: Financial Difficulty Over Time in Young Adults With Breast Cancer
Source: PubMed Central journal article supplement (PMC11561695; doi:10.1001/jamanetworkopen.2024.46091), 2024-11-13
Supplement: jamanetwopen-e2446091-s002.pdf [file jamanetwopen-e2446091-s002.pdf]

## Data Sharing Statement

Myers. Financial Difficulty Over Time in Young Adults With Breast Cancer. *JAMA Netw Open*. Published November 13, 2024. doi:10.1001/jamanetworkopen.2024.46091

### Data

**Data available:** Yes

**Data types:** Deidentified participant data

**How to access data:** The data that support these findings are available on written request to and approval from the senior author, Ann H. Partridge.

**When available:** With publication

### Supporting Documents

**Document types:** None

### Additional Information

**Who can access the data:** Researchers whose proposed use of the data has been approved

**Types of analyses:** For academic purposes

**Mechanisms of data availability:** After approval of a proposal
